# Supplementary material
Source: PubMed Central journal article supplement (PMC7540160)
Supplement: ajtr0012-5095-f10.pdf [file ajtr0012-5095-f10.pdf]

## *KIT* related deafness in miniature pigs

**Table S1.** Sequence of primer pairs of exons of *KIT* gene for PCR

| KIT exon | Primers (5'-3')                                            | Product length |
|----------|------------------------------------------------------------|----------------|
| 1        | F: GCTTTGTCCTATTTTATTGTCG<br>R: GCTTTGTCCTATTTTATTGTCG     | 492 bp         |
| 2        | F: TTCGTTAACCACTGCTCCAC<br>R: GAGCGGCTATCCAAGTGAC          | 500 bp         |
| 3        | F: TATTCGAAAGGCCATACAGTG<br>R: CACAACACTGTATGAAAGCAACTA    | 374 bp         |
| 4        | F: CTAATATGGAGGAGTTAATTGCTG<br>R: CAGCGATAATCAAATACCTAAGAA | 402 bp         |
| 5        | F: CTGGAAGACATAAGATGGTGATAC<br>R: TGGCAACACTGGATCCTTAA     | 435 bp         |
| 6        | F: TGTCAAAGCAGGCGTGTA<br>R: CATGAAGCAGTATTGACCCAGTA        | 335 bp         |
| 7        | F: AAAGTTTTAAGGATTGGCAGA<br>R: AGCAATTATGCCCTCTAAAAG       | 376 bp         |
| 8        | F: CTTGCATATGCTGCCGGT<br>R: CAGAAATGACATGGCCAGTG           | 401 bp         |
| 9/10     | F: GCTTGACTCCTGCCATGAT<br>R: AACCAAAAAAACCTTATGATT         | 570 bp         |
| 11/12    | F: CGTCCCTGATTCCTTTATTGG<br>R: GTTCACCACCTGGGTACAATCT      | 517 bp         |
| 13       | F: CTGCATGTGAATGGCCGT<br>R: TGAACTCTCTCAGCCGTTAATC         | 411 bp         |
| 14       | F: TCTTATGTGAAAATGGGAGTGG<br>R: GCCCCTGGATCCTACTATAAA      | 312 bp         |
| 15       | F: AGTTCATTGCTGCTGCCAT<br>R: GGCACTCTGCTTTCTAACTACG        | 332 bp         |
| 16       | F: ATTAACATAGCTTCCCTCTTG<br>R: TTCCTTTGCATGCCCTCT          | 404 bp         |
| 17       | F: TGCCCGTCAAGTTCTCACC<br>R: CCTCCTTGATCATCTTGTAGAATTT     | 389 bp         |
| 18       | F: CCAAAGGCACCTCAGTTAGA<br>R: GAAAAGGACATCTGACCAGGA        | 345 bp         |
| 19       | F: TAGGTCCGGTTGCATGGC<br>R: AGGAGAGAAGGAGTGGGTAGC          | 323 bp         |
| 20       | F: TCTTTGTAAGTTACTTGCGATTCT<br>R: CGGAGCATCCACTACCCT       | 364 bp         |
